# Supplementary material for: Enhanced speed of bimetallic nanorod motors by surface roughening
Source: Royal Society of Chemistry journal article supplement (doi:10.1039/b911561g), 2009-01-01
Supplement: b911561g.pdf [file b911561g.pdf]

Supplemental Information

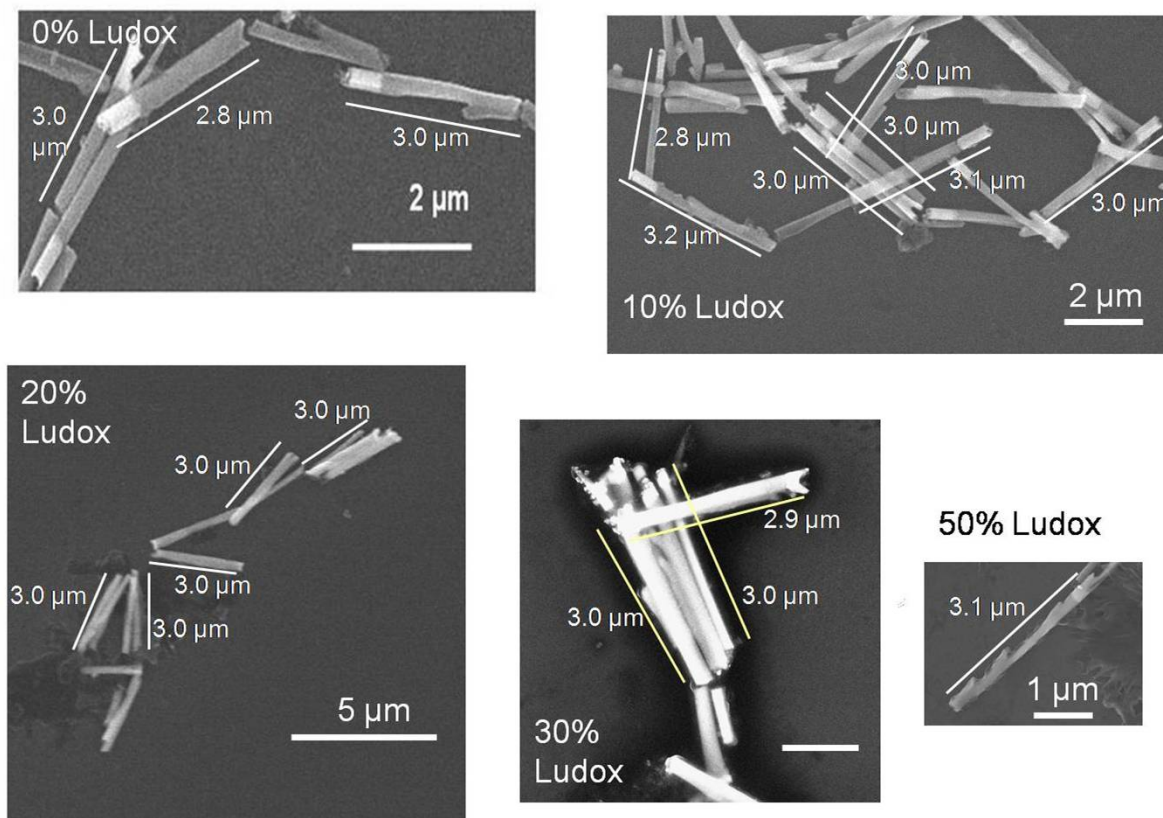

Fig. S-1: This figure shows Au-Ni rods synthesized with different concentrations of Ludox in the Ni plating solution. The average length of these rods is the same for each rod type; roughly 3.0 micron. There is always some distribution of rod length as well as defect rods (Au and Ni segments may break apart during cleaning, or membrane defects cause the formation of branched rods or otherwise defective rods. Nanorods formed with higher Ludox concentration break more easily and are therefore more difficult to image in large number.
